# Supplementary material
Source: PubMed Central journal article supplement (PMC3400802)
Supplement: supp_112.193482_JPET193482_Supplement.pdf [file supp_112.193482_JPET193482_Supplement.pdf]

Gitanjali A. Narayanan, Iain A. Murray, Gowdahalli Krishnegowda, Shantu Amin and Gary H. Perdew

Selective Ah receptor modulator mediated repression of CD55 expression leads to enhanced C3 deposition

*Journal of Pharmacology and Experimental Therapeutics*

**Supplementary Table 1: Quantitative real-time PCR primer sequences**

| <b>Gene</b> | <b>Primer Sequence</b>                                         |
|-------------|----------------------------------------------------------------|
| hL13a       | 5' CCTGGAGGAGAAGAGGAAAGAGA 3'<br>5' GAGGACCTCTGTGTATTTGTCAA 3' |
| CYP1A1      | 5' GATTGGGCACATGCTGACC 3'<br>5' CTGTCAAGGATGAGCCAGCA 3'        |
| CD55        | 5' CAGGACCACCACAAATTGAC 3'<br>5' CTGAACTGTTGGTGGGACCT 3'       |
| CD46        | 5' AACCTCCAGCTTTGAGTTCATTC 3'<br>5' GGCATATTCAGCTCCACCAT 3'    |

**Supplementary Table 2: Oligonucleotide sequences for cloning of the full length CD55 promoter and mutant constructs**

| <b>Construct</b> | <b>Primer sequences</b>                                               |
|------------------|-----------------------------------------------------------------------|
| CD55 -871/+71    | 5' ATCGAAGCTTCCGGGGGCCCTAGACTC 3'<br>5' ATCGCTCGAGCATATACCCATCAATG 3' |
| CD55 -250/+71    | 5' ATCCCTTGAGGCACTCAAGCGCGG 3'<br>5' ATCGAAGCTTCCGGGGGCCCTAGACTC 3'   |
| CD55 KB1         | 5' CCGCTTAGCTACTCAAGCGCGGTTAT 3'<br>5' ATAACCGCGCTTGAGTAGCTAAGCGG 3'  |
| CD55 KB2         | 5' CGCGGTGCTCTAAACGCGTCTTGGG 3'<br>5' CCCAAGACGCGTTTAGAGCACCGCG 3'    |
| CD55 RelA        | 5' AGACCTGGGGAACCAGGTTGAATAAC 3'<br>5' GTTATTCAACCTGGTTCCCCAGGTCT 3'  |
| CD55 Cre         | 5' CCCACCCTTGGCTACGCAGAGCCC 3'<br>5' GGGCTCTGCGTAGCCAAGGGTGGG 3'      |

### Supplementary Figure 1: siRNA mediated knockdown of *AHR* in Hep3B cells

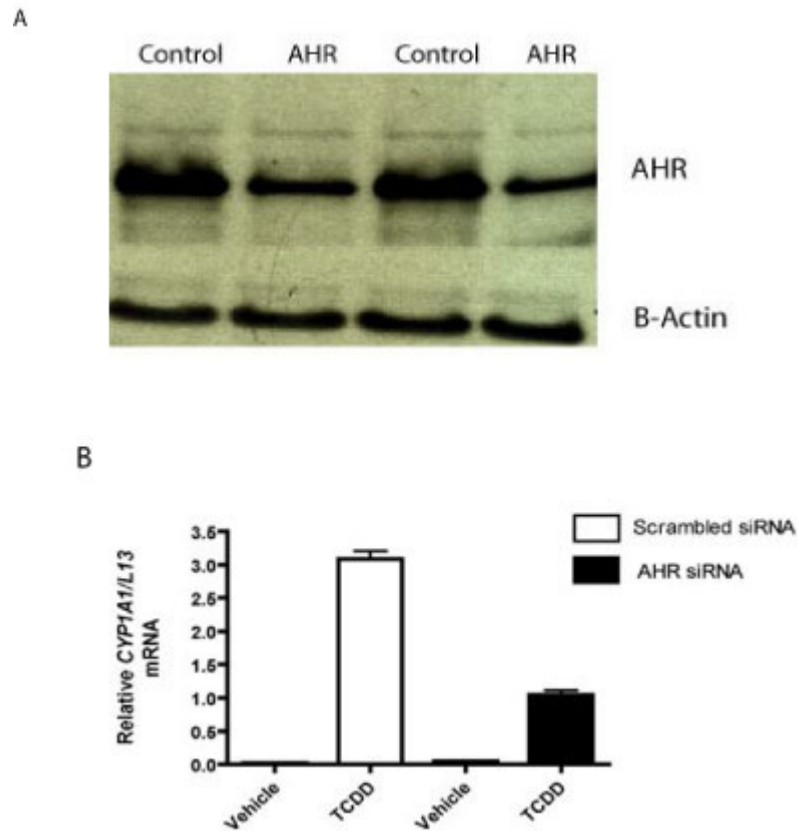

### Supplementary Figure 1: siRNA-mediated knockdown of AHR

Hep3B cells were electroporated with siRNA targeted either for *AHR* or scrambled and split into 6 well plates. Verification of knockdown was achieved by (A) protein immunoblotting with a primary antibody for AHR and (B) *CYP1A1* mRNA expression following treatment of cells with either vehicle or 10 nM TCDD for 24 h.

**Supplementary Figure 2: siRNA mediated knockdown of *RelA/p65* in Hep3B cells**

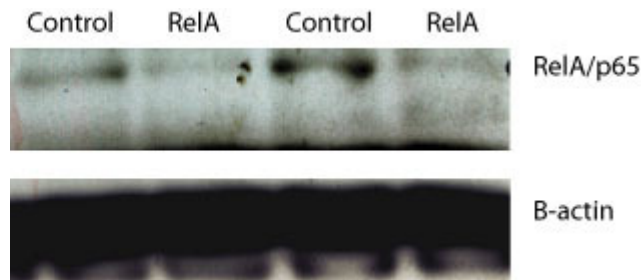

**Supplementary Figure 2: Verification of siRNA mediated knockdown of *RelA/p65*.**

Hep3B cells were electroporated with siRNA targeted for either control (scrambled) *RelA/p65* and split into 6 well plates. Cells were allowed to recover for 24 h, lysed and a protein immunoblot was performed to verify knockdown of *RelA* using a primary antibody against *RelA*.

### Supplementary Figure 3

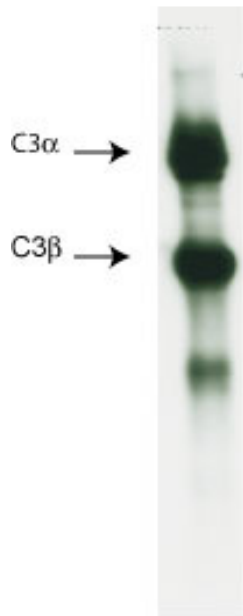

### Supplementary Figure 3: Verification of iodination of C3

Complement component 3 was iodinated with  $^{125}\text{I}$  and 1  $\mu\text{L}$  of  $^{125}\text{I}$ -C3 was run on an SDS-PAGE gel, which was then transferred to a PVDF membrane and visualized by autoradiography
